# Supplementary material for: Metabolite variation in the lettuce gene pool: towards healthier crop varieties and food
Source: PubMed Central journal article supplement (PMC6208706; doi:10.1007/s11306-018-1443-8), 2018-10-29

**Supplementary Figure 1:** Biplot for the LCMS data with loadings indicated as arrows.

Loadings for the phytochemicals specific for each of the species *L. sativa*, *L. serriola*,

*L. saligna* and *L. virosa* (Fig. 3) are colour-marked.

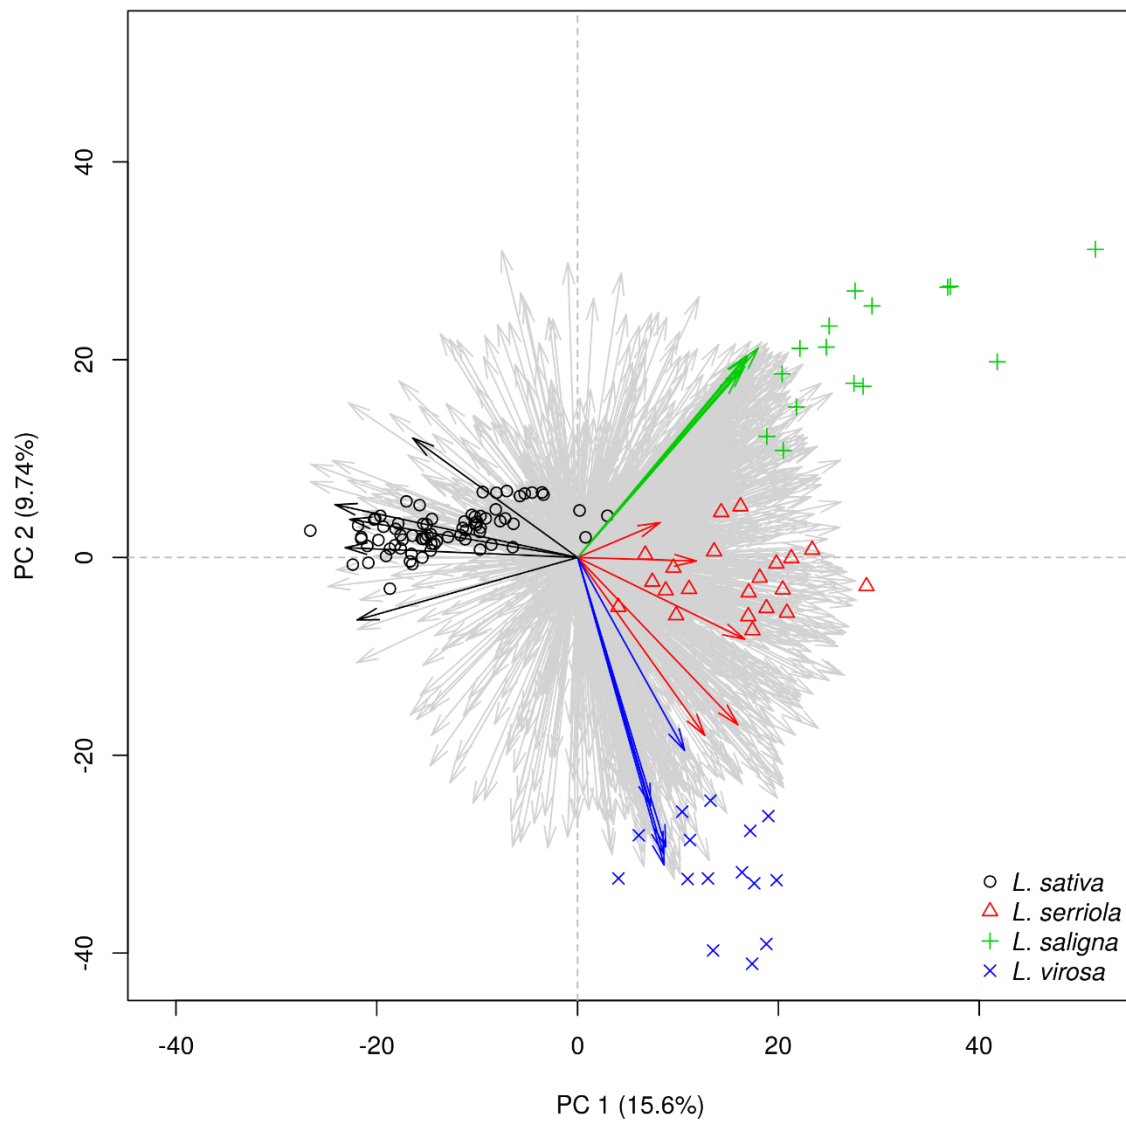

Supplement: 11306_2018_1443_MOESM1_ESM.pdf [file 11306_2018_1443_MOESM1_ESM.pdf]
