# Supplementary material for: Metabolite variation in the lettuce gene pool: towards healthier crop varieties and food
Source: PubMed Central journal article supplement (PMC6208706; doi:10.1007/s11306-018-1443-8), 2018-10-29
Supplement: 11306_2018_1443_MOESM2_ESM.pdf [file 11306_2018_1443_MOESM2_ESM.pdf]

**Supplementary Table 1:** Origin, taxonomy and presumed gene pool status of the research lines used for metabolite profiling.

| Line    | Source <sup>1</sup> | Species          | Crop type  | Gene pool | Line    | Source <sup>1</sup> | Species            | Gene pool |
|---------|---------------------|------------------|------------|-----------|---------|---------------------|--------------------|-----------|
| TKI-006 | CGN04613            | <i>L. sativa</i> | Butterhead | 1         | TKI-150 | CGN05099            | <i>L. serriola</i> | 1         |
| TKI-011 | CGN04818            | <i>L. sativa</i> | Butterhead | 1         | TKI-157 | CGN05153            | <i>L. serriola</i> | 1         |
| TKI-016 | CGN04895            | <i>L. sativa</i> | Butterhead | 1         | TKI-160 | CGN05158            | <i>L. serriola</i> | 1         |
| TKI-019 | CGN05140            | <i>L. sativa</i> | Butterhead | 1         | TKI-184 | CGN09309            | <i>L. serriola</i> | 1         |
| TKI-020 | CGN05163            | <i>L. sativa</i> | Butterhead | 1         | TKI-194 | CGN10907            | <i>L. serriola</i> | 1         |
| TKI-026 | CGN05813            | <i>L. sativa</i> | Butterhead | 1         | TKI-195 | CGN10938            | <i>L. serriola</i> | 1         |
| TKI-036 | CGN09380            | <i>L. sativa</i> | Butterhead | 1         | TKI-197 | CGN10978            | <i>L. serriola</i> | 1         |
| TKI-041 | CGN10966            | <i>L. sativa</i> | Butterhead | 1         | TKI-202 | CGN11334            | <i>L. serriola</i> | 1         |
| TKI-042 | CGN11338            | <i>L. sativa</i> | Butterhead | 1         | TKI-204 | CGN11402            | <i>L. serriola</i> | 1         |
| TKI-043 | CGN11340            | <i>L. sativa</i> | Butterhead | 1         | TKI-222 | CGN14263            | <i>L. serriola</i> | 1         |
| TKI-045 | CGN11364            | <i>L. sativa</i> | Butterhead | 1         | TKI-232 | CGN15673            | <i>L. serriola</i> | 1         |
| TKI-048 | CGN11403            | <i>L. sativa</i> | Butterhead | 1         | TKI-234 | CGN15678            | <i>L. serriola</i> | 1         |
| TKI-052 | CGN14317            | <i>L. sativa</i> | Butterhead | 1         | TKI-252 | CGN15730            | <i>L. serriola</i> | 1         |
| TKI-055 | CGN14640            | <i>L. sativa</i> | Butterhead | 1         | TKI-257 | CGN15737            | <i>L. serriola</i> | 1         |
| TKI-061 | CGN19028            | <i>L. sativa</i> | Butterhead | 1         | TKI-260 | CGN16210            | <i>L. serriola</i> | 1         |
| TKI-063 | CGN20139            | <i>L. sativa</i> | Butterhead | 1         | TKI-266 | CGN17389            | <i>L. serriola</i> | 1         |
| TKI-064 | CGN20716            | <i>L. sativa</i> | Butterhead | 1         | TKI-275 | CGN18657            | <i>L. serriola</i> | 1         |
| TKI-065 | CGN24530            | <i>L. sativa</i> | Butterhead | 1         | TKI-286 | CGN19052            | <i>L. serriola</i> | 1         |
| TKI-066 | CGN24542            | <i>L. sativa</i> | Butterhead | 1         | TKI-338 | CGN24779            | <i>L. serriola</i> | 1         |
| TKI-067 | CGN24683            | <i>L. sativa</i> | Butterhead | 1         | TKI-339 | CGN24780            | <i>L. serriola</i> | 1         |
| TKI-069 | CGN04508            | <i>L. sativa</i> | Crisp      | 1         | TKI-340 | UC Davis            | <i>L. serriola</i> | 1         |
| TKI-070 | CGN04542            | <i>L. sativa</i> | Crisp      | 1         | TKI-342 | CGN05271            | <i>L. saligna</i>  | 2         |
| TKI-071 | CGN04581            | <i>L. sativa</i> | Crisp      | 1         | TKI-343 | CGN05282            | <i>L. saligna</i>  | 2         |
| TKI-077 | CGN05170            | <i>L. sativa</i> | Crisp      | 1         | TKI-344 | CGN05301            | <i>L. saligna</i>  | 2         |
| TKI-078 | CGN05182            | <i>L. sativa</i> | Crisp      | 1         | TKI-345 | CGN05304            | <i>L. saligna</i>  | 2         |
| TKI-079 | CGN05253            | <i>L. sativa</i> | Crisp      | 1         | TKI-355 | CGN05318            | <i>L. saligna</i>  | 2         |
| TKI-081 | CGN09381            | <i>L. sativa</i> | Crisp      | 1         | TKI-364 | CGN05327            | <i>L. saligna</i>  | 2         |
| TKI-082 | CGN10976            | <i>L. sativa</i> | Crisp      | 1         | TKI-366 | CGN05330            | <i>L. saligna</i>  | 2         |
| TKI-083 | CGN11440            | <i>L. sativa</i> | Crisp      | 1         | TKI-369 | CGN05947            | <i>L. saligna</i>  | 2         |
| TKI-085 | CGN14702            | <i>L. sativa</i> | Crisp      | 1         | TKI-374 | CGN13326            | <i>L. saligna</i>  | 2         |
| TKI-088 | CGN24676            | <i>L. sativa</i> | Crisp      | 1         | TKI-376 | CGN13330            | <i>L. saligna</i>  | 2         |
| TKI-089 | CGN24689            | <i>L. sativa</i> | Crisp      | 1         | TKI-379 | CGN13375            | <i>L. saligna</i>  | 2         |
| TKI-090 | CGN25047            | <i>L. sativa</i> | Crisp      | 1         | TKI-382 | CGN15705            | <i>L. saligna</i>  | 2         |
| TKI-091 | CGN25055            | <i>L. sativa</i> | Crisp      | 1         | TKI-383 | CGN15716            | <i>L. saligna</i>  | 2         |
| TKI-092 | UC Davis            | <i>L. sativa</i> | Crisp      | 1         | TKI-391 | CGN19047            | <i>L. saligna</i>  | 2         |
| TKI-093 | CGN06018            | <i>L. sativa</i> | Latin      | 1         | TKI-395 | CGN20697            | <i>L. saligna</i>  | 2         |
| TKI-094 | CGN09377            | <i>L. sativa</i> | Latin      | 1         | TKI-404 | CGN04683            | <i>L. virosa</i>   | 3         |
| TKI-095 | CGN11339            | <i>L. sativa</i> | Latin      | 1         | TKI-406 | CGN04955            | <i>L. virosa</i>   | 3         |
| TKI-096 | CGN13385            | <i>L. sativa</i> | Latin      | 1         | TKI-407 | CGN05077            | <i>L. virosa</i>   | 3         |
| TKI-097 | CGN24517            | <i>L. sativa</i> | Latin      | 1         | TKI-409 | CGN05148            | <i>L. virosa</i>   | 3         |
| TKI-099 | CGN04740            | <i>L. sativa</i> | Cos        | 1         | TKI-410 | CGN05268            | <i>L. virosa</i>   | 3         |
| TKI-100 | CGN04746            | <i>L. sativa</i> | Cos        | 1         | TKI-412 | CGN05332            | <i>L. virosa</i>   | 3         |
| TKI-101 | CGN04766            | <i>L. sativa</i> | Cos        | 1         | TKI-414 | CGN05794            | <i>L. virosa</i>   | 3         |
| TKI-104 | CGN05004            | <i>L. sativa</i> | Cos        | 1         | TKI-419 | CGN09365            | <i>L. virosa</i>   | 3         |
| TKI-105 | CGN05057            | <i>L. sativa</i> | Cos        | 1         | TKI-420 | CGN13302            | <i>L. virosa</i>   | 3         |
| TKI-106 | CGN05238            | <i>L. sativa</i> | Cos        | 1         | TKI-422 | CGN13337            | <i>L. virosa</i>   | 3         |
| TKI-107 | CGN05249            | <i>L. sativa</i> | Cos        | 1         | TKI-425 | CGN13356            | <i>L. virosa</i>   | 3         |
| TKI-108 | CGN05827            | <i>L. sativa</i> | Cos        | 1         | TKI-427 | CGN14290            | <i>L. virosa</i>   | 3         |
| TKI-109 | CGN06003            | <i>L. sativa</i> | Cos        | 1         | TKI-431 | CGN16267            | <i>L. virosa</i>   | 3         |

|         |          |                    |         |   |         |            |                         |   |
|---------|----------|--------------------|---------|---|---------|------------|-------------------------|---|
| TKI-110 | CGN09375 | <i>L. sativa</i>   | Cos     | 1 | TKI-434 | CGN16285   | <i>L. virosa</i>        | 3 |
| TKI-113 | CGN14656 | <i>L. sativa</i>   | Cos     | 1 | TKI-442 | CGN18980   | <i>L. virosa</i>        | 3 |
| TKI-114 | CGN16252 | <i>L. sativa</i>   | Cos     | 1 | TKI-453 | CGN15677   | <i>L. georgica</i>      | 1 |
| TKI-115 | CGN18720 | <i>L. sativa</i>   | Cos     | 1 | TKI-454 | CGN15679   | <i>L. georgica</i>      | 1 |
| TKI-116 | CGN24515 | <i>L. sativa</i>   | Cos     | 1 | TKI-456 | CGN15681   | <i>L. georgica</i>      | 1 |
| TKI-117 | CGN24776 | <i>L. sativa</i>   | Cos     | 1 | TKI-460 | CGN16201   | <i>L. georgica</i>      | 1 |
| TKI-118 | CGN04642 | <i>L. sativa</i>   | Cutting | 1 | TKI-464 | CGN09357   | <i>L. aculeata</i>      | 1 |
| TKI-119 | CGN04797 | <i>L. sativa</i>   | Cutting | 1 | TKI-465 | CGN15692   | <i>L. aculeata</i>      | 1 |
| TKI-120 | CGN05063 | <i>L. sativa</i>   | Cutting | 1 | TKI-466 | CGN04664   | <i>L. altaica</i>       | 1 |
| TKI-121 | CGN05241 | <i>L. sativa</i>   | Cutting | 1 | TKI-467 | CGN15711   | <i>L. altaica</i>       | 1 |
| TKI-122 | CGN05852 | <i>L. sativa</i>   | Cutting | 1 | TKI-468 | CGN04790   | <i>L. dregeana</i>      | 1 |
| TKI-123 | CGN10956 | <i>L. sativa</i>   | Cutting | 1 | TKI-469 | CGN05805   | <i>L. dregeana</i>      | 1 |
| TKI-125 | CGN11444 | <i>L. sativa</i>   | Cutting | 1 | TKI-471 | CGN13305   | <i>L. biennis</i>       |   |
| TKI-126 | CGN11445 | <i>L. sativa</i>   | Cutting | 1 | TKI-472 | CGN18998   | <i>L. biennis</i>       |   |
| TKI-127 | CGN13298 | <i>L. sativa</i>   | Cutting | 1 | TKI-473 | CGN14308   | <i>L. canadensis</i>    |   |
| TKI-129 | CGN13367 | <i>L. sativa</i>   | Cutting | 1 | TKI-474 | CGN17388   | <i>L. canadensis</i>    |   |
| TKI-130 | CGN14606 | <i>L. sativa</i>   | Cutting | 1 | TKI-477 | CGN14312   | <i>L. indica</i>        |   |
| TKI-132 | CGN19069 | <i>L. sativa</i>   | Cutting | 1 | TKI-478 | CGN14316   | <i>L. indica</i>        |   |
| TKI-133 | CGN24721 | <i>L. sativa</i>   | Cutting | 1 | TKI-483 | NC097273   | <i>L. taraxacifolia</i> | 3 |
| TKI-134 | CGN24778 | <i>L. sativa</i>   | Cutting | 1 | TKI-484 | 09H5801132 | <i>L. taraxacifolia</i> | 3 |
| TKI-135 | CGN25052 | <i>L. sativa</i>   | Cutting | 1 | TKI-485 | CGN09323   | <i>L. perennis</i>      |   |
| TKI-136 | CGN05061 | <i>L. sativa</i>   | Stalk   | 1 | TKI-486 | CGN13299   | <i>L. perennis</i>      |   |
| TKI-137 | CGN05292 | <i>L. sativa</i>   | Stalk   | 1 | TKI-488 | CGN09390   | <i>L. tatarica</i>      | 3 |
| TKI-138 | CGN10931 | <i>L. sativa</i>   | Stalk   | 1 | TKI-489 | CGN18616   | <i>L. tatarica</i>      | 3 |
| TKI-139 | CGN04777 | <i>L. sativa</i>   | Oilseed | 1 | TKI-492 | CGN14301   | <i>L. viminea</i>       | 3 |
| TKI-140 | CGN04770 | <i>L. serriola</i> | Oilseed | 1 | TKI-493 | CGN16202   | <i>L. viminea</i>       | 3 |

<sup>1</sup> CGN: Centre for Genetic Resources, the Netherlands; UC Davis: Genome Centre, University of California, Davis, USA; NC097273: Centro de Investigación y Tecnología Agroalimentaria, Zaragoza, Spain; 09H5801132: Research Institute of Crop Production, Olomouc, Czech Republic
